# Supplementary material for: Acid-treated multi-walled carbon nanotubes as additives for negative active materials to improve high-rate-partial-state-of-charge cycle-life of lead-acid batteries
Source: Royal Society of Chemistry journal article supplement (doi:10.1039/d1ra02208c), 2021-01-01
Supplement: d1ra02208c1.pdf [file d1ra02208c1.pdf]

# Acid-Treated Multi-Walled Carbon Nanotubes as Additives for Negative Active Materials to Improve High-Rate-Partial-State-of- Charge Cycle-life of Lead-Acid Battery

Li Dong<sup>a, b</sup>, Chunhua Chen<sup>a</sup>, Jiejie Wang<sup>a</sup>, Hongwei Li<sup>a</sup>, Hui Zheng<sup>a</sup>, Wei Yan<sup>a, 1</sup>, Joey  
Chung-Yen Jung<sup>a</sup> and Jiujun Zhang<sup>a, \*</sup>

<sup>a</sup>Institute for Sustainable Energy, College of Sciences, Shanghai University,  
Shanghai, 200444, P.R. China

<sup>b</sup>Zhaoqing Leoch Battery Technology Co. Ltd., Guangdong Province, 518000 China

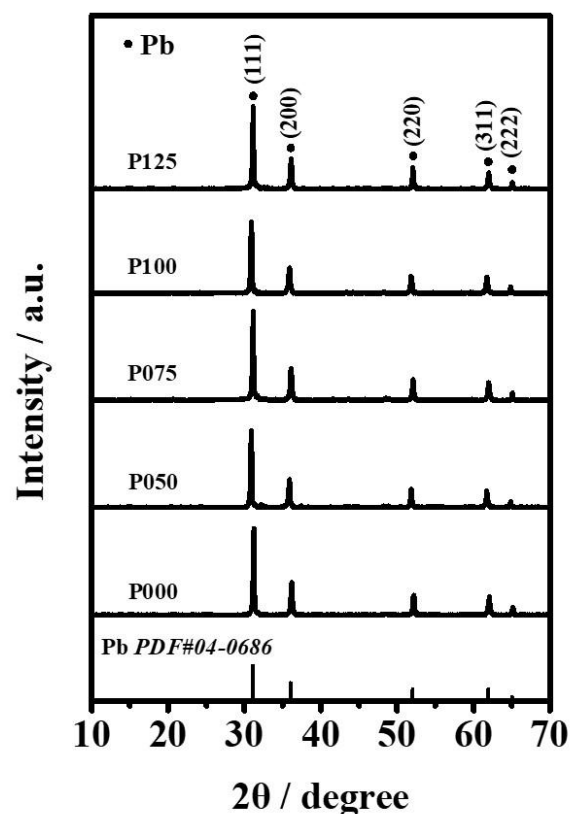

Figure S1. XRD patterns of the NAMs collected from the interior of the formed negative plates.

<sup>1</sup> Corresponding authors.

E-mail addresses: yveayan@shu.edu.cn, jiujun.zhang@i.shu.edu.cn.

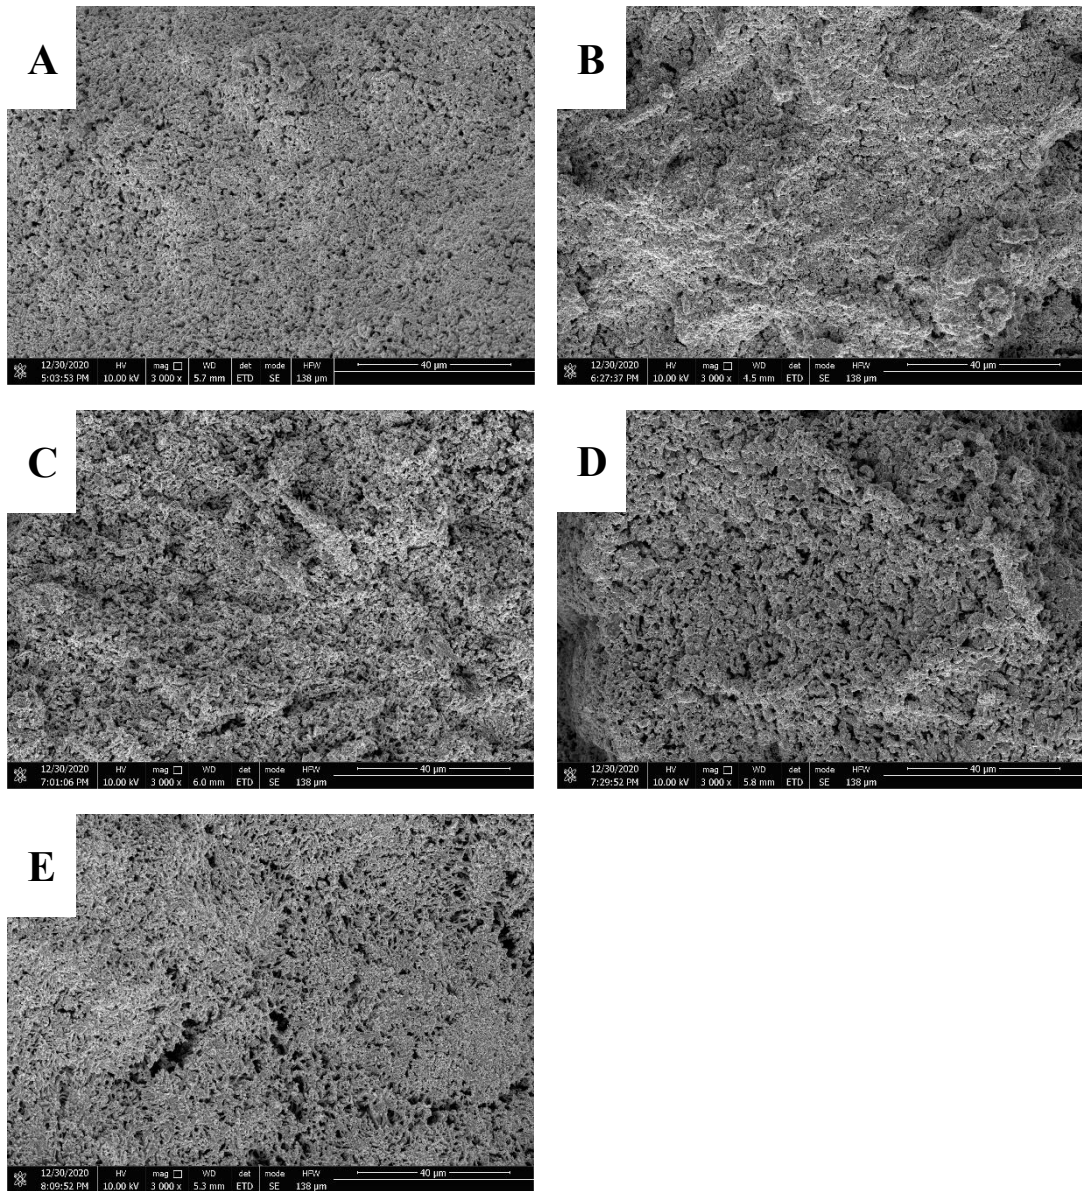

Figure S2. SEM images of the NAMs collected from the interior of the formed negative plates: P000 (A), P050 (B), P075 (C), P100 (D) and P125 (E). (Magnification: 3,000X)

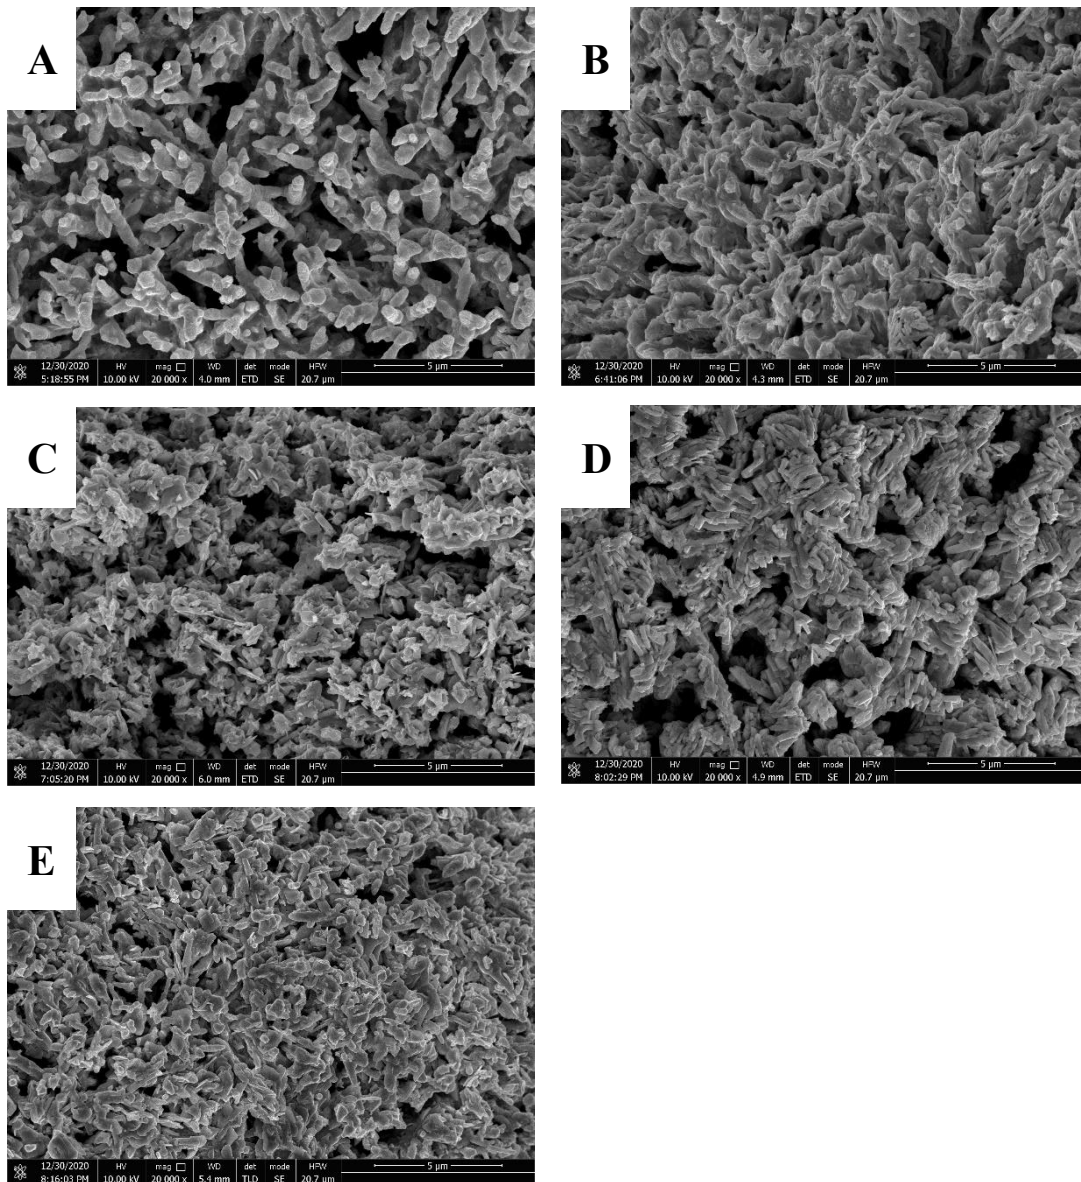

Figure S3. SEM images of the NAMs collected from the interior of the formed negative plates: P000 (A), P050 (B), P075 (C), P100 (D) and P125 (E). (Magnification: 20,000X)

Table S1. Peak potentials and peak currents obtained from the CV curves of different plates

| Plates | Anodic peak Potential (V) | Anodic peak Current (A) | Cathodic peak Potential (V) | Cathodic peak Current (A) |
|--------|---------------------------|-------------------------|-----------------------------|---------------------------|
| P000   | -0.88                     | 2.41                    | -1.22                       | -1.91                     |
| P050   | -0.84                     | 2.32                    | -1.22                       | -1.91                     |
| P075   | -0.87                     | 2.67                    | -1.16                       | -1.92                     |
| P100   | -0.84                     | 3.05                    | -1.20                       | -2.54                     |
| P125   | -0.83                     | 2.80                    | -1.18                       | -2.34                     |

Table S2. Charge resistance ( $R_{ct}$ ) values obtained from the Nyquist plots

| Plates | $R_{ct}$ ( $\Omega$ ) |
|--------|-----------------------|
| P000   | 0.082                 |
| P050   | 0.10                  |
| P075   | 0.094                 |
| P100   | 0.065                 |
| P125   | 0.099                 |
